# Supplementary material for: High-Alpine Permafrost and Active-Layer Soil Microbiomes Differ in Their Response to Elevated Temperatures
Source: Front Microbiol. 2019 Apr 3;10:668. doi: 10.3389/fmicb.2019.00668 (PMC6456652; doi:10.3389/fmicb.2019.00668)
Supplement: TABLE S1 — Effects of soil origin, temperature and their interactions on DNA content, specific respiration activity (SRA) and potential enzymatic activities. [file Table_1.xlsx]

## Sheet: List1
Table S1: Effects of soil origin, temperature and their interactions on DNA content, specific respiration activity (SRA) and potential enzymatic activities
	DNA	SRA	SUM enz	Cenz	Nenz	Penz
	ng g-1dw	μgC gDNA-1 h-1	nmol h-1 g-1dw	% of SUM enz
Main effects (Acclimation)
Soil origin	F2,38=135***	F2,38=24.4***	F2,38=178***	F2,38=55.0***	F2,28=20.9***	F2,38=299***
Temperature	F3,38=3.70*	F3,38=4.25*	F3,38=1.37NS	F3,38=4.61**	F3,38=21.2** *	F3,38=0.48NS
Soil x Temperature	F9,38=69.3***	F9,38=65.2***	F9,38=56.3***	F9,38=25.9***	F9,38=36.1***	F9,38=103***
Main effects (Heat shock)
Soil origin	F2,38=96.5***	F2,38=9.13***	F2,38=172***	F2,38=62.1***	F2,38=75.8***	F2,38=187***
Temperature	F3,38=0.76NS	F3,38=0.71NS	F3,38=1.39NS	F3,38=1.45NS	F3,38=0.08NS	F3,38=0.04NS
Soil x Temperature	F9,38=47.0***	F9,38=2.21NS	F9,38=65.5***	F9,38=13.6***	F9,38=19.3***	F9,38=75.0***
PF
Acclimation	F1,6=0.70NS	F1,6=0.36NS	F1,6=1.96NS	F1,6=0.24NS	F1,6=0.71NS	F1,6=4.48NS
4°C	7.82 (0.69)	279 (33.5)	9.04 (1.68)	24.5 (5.49)	68.3 (5.62)	7.30 (1.41)
25°C	11.2 (3.97)	369 (120)	11.6 (0.87)	21.7 (2.99)	73.3 (3.01)	5.07 (0.26)
Heat shock	F2,9=3.09NS	F2,9=8.1*	F2,9=3.4NS	F2,9=0.25NS	F2,9=0.33NS	F2,9=2.84NS
4°C control	7.82 (0.69)	279 (33.5) a	9.04 (1.68)	24.5 (5.49)	68.3 (5.62)	7.30 (1.41)
4°C	3.37 (0.66)	10.0 (8.18) b	7.80 (0.22)	18.8 (2.25)	74.2 (2.20)	6.98 (0.24)
25°C	12.5 (5.93)	3.75 (3.25) b	13.5 (2.39)	22.1 (6.64)	73.2 (6.13)	4.76 (0.68)
NW
Acclimation	F3,15=23.6***	F3,15=35.4***	F3,15=1.13NS	F3,15=35.9***	F3,15=22.1***	F3,15=2.40NS
4°C	1571 (145) a	5.55 (0.40) c	175 (11.9)	56.3 (1.43) b	40.4 (1.38) a	3.28 (0.43)
15°C	1565 (63.9) a	12.3 (0.25) cb	164 (11.7)	52.2 (0.86) b	44.6 (0.76) a	3.20 (0.28)
25°C	1380 (80.5) a	25.3 (1.17) b	124 (9.75)	50.1 (2.21) b	47.2 (2.30) a	2.69 (0.34)
40°C	277 (76.0) b	118 (42.2) a	144 (36.9)	76.9 (3.03) a	20.9 (2.87) b	2.24 (0.22)
Heat shock	F4,19=40.7***	F4,19=1.61NS	F4,19=2.36NS	F4,19=3.17*	F4,19=2.34NS	F4,19=6.33**
4°C control	1571 (145) a	5.55 (0.40)	175 (11.9)	56.3 (1.43) b	40.4 (1.38) a	3.28 (0.43) a
4°C	371 (11.8) b	3.06 (0.30)	230 (11.5)	67.7 (1.57) ab	29.8 (2.20) ab	2.49 (0.37) ab
15°C	281 (29.7) b	3.45 (0.84)	223 (55.3)	73.3 (4.48) a	24.4 (4.29) b	2.34 (0.28) ab
25°C	302 (73.2) b	2.64 (0.78)	145 (5.82)	68.3 (3.24) ab	27.8 (3.08) ab	3.92 (0.22) a
40°C	260 (23.7) b	2.13 (0.97)	191 (9.58)	65.4 (5.63) ab	33.0 (5.85) ab	1.54 (0.30) b
SE
Acclimation	F3,15=14.6***	F3,15=35.6***	F3,15=35.3***	F3,15=11.5***	F3,15=35.7***	F3,15=4.01*
4°C	2671 (212) a	1.02 (0.07) c	103 (2.5) a	32.2 (1.49) b	41.3 (1.79) a	26.5 (2.27) ab
15°C	3047 (217) a	2.70 (0.12) b	113 (5.42) a	33.2 (1.88) b	44.5 (1.70) a	22.3 (1.48) b
25°C	2471 (486) a	8.75 (2.45) b	106 (5.76) a	32.5 (0.55) b	44.7 (1.81) a	22.7 (1.42) b
40°C	1084 (40.3) b	21.9 (0.93) a	63.3 (2.43) b	43.3 (1.76) a	25.8 (1.19) b	30.9 (2.72) a
Heat shock	F4,19=61.3***	F4,19=0.53NS	F4,19=6.51**	F4,19=32.6*	F4,19=14.9***	F4,19=1.48NS
4°C control	2671 (212) a	1.02 (0.07)	103 (2.50) a	32.2 (1.49) b	41.3 (1.79) a	26.5 (2.27)
4°C	977 (15.8) b	1.21 (0.13)	75.4 (2.44) b	50.0 (1.56) a	27.3 (0.79) b	22.7 (1.36)
15°C	1187 (53.8) b	1.05 (0.10)	81.5 (6.92) ab	56.4 (2.16) a	23.6 (1.37) cb	20.0 (0.81)
25°C	1252 (114) b	0.82 (0.23)	80.1 (8.53) ab	56.9 (2.44) a	20.9 (2.15) c	22.2 (2.61)
40°C	538 (55.0) c	0.75 (0.34)	62.5 (4.37) b	49.3 (1.72) a	28.8 (2.38) b	21.9 (2.11)
