# Supplementary material for: High-Alpine Permafrost and Active-Layer Soil Microbiomes Differ in Their Response to Elevated Temperatures
Source: Front Microbiol. 2019 Apr 3;10:668. doi: 10.3389/fmicb.2019.00668 (PMC6456652; doi:10.3389/fmicb.2019.00668)
Supplement: TABLE S2 — Effects of soil origin, temperature, and their interactions on bacterial and fungal alpha-diversity. [file Table_2.XLSX]

## Sheet: List1
Table S2: Effects of soil origin, temperature and their interactions on bacterial and fungal alpha-diversity
	BACTERIA			FUNGI
	Sobs	Shannon	Evenness	Sobs	Shannon	Evenness
Main effects (Acclimation)
Soil origin	F2,38=9.78***	F2,38=13.6***	F2,38=14.3***	F2,38=15.7***	F2,38=15.9***	F2,38=12.8***
Temperature	F3,38=13.4***	F3,38=7.67***	F3,38=6.47***	F3,38=0.90NS	F3,38=1.52NS	F3,38=1.35NS
Soil x Temperature	F9,38=169.1***	F9,38=83.2***	F9,38=70.1***	F9,38=2.58***	F9,38=22.8***	F9,38=23.0***
Main effects (Heat shock)
Soil origin	F2,38=7.35**	F2,38=6.68**	F2,38=7.07**	F2,38=14.2***	F2,38=0.87NS	F2,38=0.50NS
Temperature	F3,38=17.7***	F3,38=12.3***	F9,38=10.1** *	F3,38=2.07NS	F3,38=4.89**	F3,38=5.03**
Soil x Temperature	F9,38=73.6***	F9,38=31.1***	F9,38=19.6***	F9,38=5.71***	F9,38=3.00*	F9,38=3.05*
PF
Acclimation	F1,6=26.0**	F1,6=2.28NS	F1,6=0.67NS	F1,6=0.26NS	F1,6=6.89*	F1,6=8.00*
4°C	951 (12.6) a	4.23 (0.04)	0.62 (0.01)	196 (9.49)	2.44 (0.10) b	0.46 (0.01) b
25°C	811 (21.9) b	3.99 (0.12)	0.60 (0.01)	205 (13.5)	2.98 (0.17) a	0.56 (0.03) a
Heat shock	F2,9=30.8***	F2,9=12.5**	F2,9=5.55*	F2,9=0.78NS	F2,9=1.83NS	F2,9=4.29NS
4°C control	951 (12.6) a	4.23 (0.04) a	0.62 (0.01) a	196 (9.49)	2.44 (0.10)	0.46 (0.01)
4°C	552 (29.2) b	3.50(0.08) c	0.55 (0.01) b	160 (30.4)	2.25 (0.29)	0.44 (0.03)
25°C	588 (32.7) b	3.82 (0.12) b	0.60 (0.01) a	163 (17.5)	2.77 (0.16)	0.55 (0.02)
NW
Acclimation	F3,15=320***	F3,15=256***	F3,15=185***	F3,15=0.56NS	F3,15=50.5***	F3,15=45.8***
4°C	1407 (12.4) a	5.91 (0.02) a	0.82 (0.001) a	251 (7.05)	3.87 (0.04) a	0.70 (0.005) a
15°C	1399 (15.9) a	6.05 (0.01) a	0.83 (0.001) a	250 (10.9)	3.82 (0.04) a	0.69 (0.004) a
25°C	1420 (7.57) a	6.00 (0.01) a	0.83 (0.000) a	239 (9.18)	3.67 (0.03) a	0.67 (0.003) a
40°C	821 (15.2) b	4.04 (0.09) b	0.60 (0.012) b	240 (5.31)	2.87 (0.10) b	0.52 (0.017) b
Heat shock	F4,19=262***	F4,19=62.9***	F4,19=41.6***	F4,19=4.19*	F4,19=7.52**	F4,19=8.01**
4°C control	1407 (12.4) a	5.91 (0.02) a	0.82 (0.00) a	251 (7.05) a	3.87 (0.04) a	0.70 (0.01) a
4°C	914 (25.6) c	4.26 (0.13) c	0.63 (0.02) c	259 (4.42) a	3.14 (0.15) a	0.57 (0.02) a
15°C	999 (12.5) b	4.65 (0.13) bc	0.67 (0.01) bc	245 (10.1) a	3.02 (0.06) a	0.55 (0.01) a
25°C	1092 (30.8) b	4.93 (0.19) b	0.71 (0.02) b	233 (7.82) ab	3.07 (0.04) a	0.56 (0.01) a
40°C	480 (12.4) d	3.35 (0.03) d	0.54 (0.00) d	203 (16.4) b	2.00 (0.37) b	0.37 (0.05) b
SE
Acclimation	F3,15=112***	F3,15=26.0***	F3,15=18.5***	F3,15=4.28*	F3,15=0.25NS	F3,15=1.38NS
4°C	1265 (16.4) a	5.30 (0.05) a	0.74 (0.005) a	219 (4.37) ab	3.18 (0.02)	0.59 (0.004)
15°C	1297 (10.9) a	5.37 (0.03) a	0.75 (0.004) a	225 (7.36) a	3.19 (0.03)	0.59 (0.002)
25°C	1312 (11.2) a	5.56 (0.01) a	0.77 (0.003) a	229 (8.99) a	3.24 (0.01)	0.60 (0.005)
40°C	835 (18.9) b	4.40 (0.16) b	0.65 (0.019) b	194 (8.78) b	3.24 (0.12)	0.61 (0.016)
Heat shock	F4,19=117***	F4,19=42.8***	F4,19=23.9***	F4,19=8.00**	F4,19=2.34NS	F4,19=1.68NS
4°C control	1265 (16.4) a	5.30 (0.05) a	0.74 (0.01) a	219 (4.37) a	3.18 (0.02)	0.59 (0.00)
4°C	907 (6.65) b	4.55 (0.03) c	0.67 (0.01) b	223 (10.1) a	3.14 (0.09)	0.58 (0.01)
15°C	980 (8.66) b	4.90 (0.11) bc	0.71 (0.01) a	205 (7.40) a	2.83 (0.21)	0.53 (0.03)
25°C	976 (42.8) b	5.00 (0.08) ab	0.73 (0.01) a	207 (10.5) a	2.98 (0.30)	0.56 (0.05)
40°C	560 (15.1) c	3.80 (0.12) d	0.60 (0.01) c	164 (8.86) b	2.46 (0.19)	0.48 (0.03)
